# Supplementary material
Source: PubMed Central journal article supplement (PMC3713019)
Supplement: jn.112.160101_nutrition160101SupplementaryData1.pdf [file jn.112.160101_nutrition160101SupplementaryData1.pdf]

## Online Supporting Material

**Supplemental Table 1:** Incorporation of  $^{14}\text{C}$ -Palmitic Acid into lipid metabolites by Caco 2 cells in the presence of antioxidant.

| Lipid Class | 2 hours  |          |          | 6 hours  |          |          |
|-------------|----------|----------|----------|----------|----------|----------|
|             | PA       | PA+GSE   | PA+EGCG  | PA       | PA+GSE   | PA+EGCG  |
|             | %        |          |          |          |          |          |
| <b>TG</b>   | 63.1±2.9 | 61.4±3.1 | 61.1±5.5 | 67.6±3.5 | 71.8±2.6 | 68.2±1.2 |
| <b>FFA</b>  | 6.30±2.1 | 4.5±0.3  | 4.2±1.0  | 2.0±1.6  | 1.8±0.5  | 1.1±0.4  |
| <b>DG/C</b> | 5.1±1.3  | 5.1±1.1  | 6.3±0.4  | 4.2±0.1  | 4.3±0.8  | 4.5±0.5  |
| <b>MG</b>   | 1.2±0.1  | 1.0±0.2  | 1.1±0.2  | 0.9±0.1  | 0.9±0.2  | 1.3±0.4  |
| <b>PL</b>   | 24.3±5.2 | 27.9±2.6 | 27.3±4.0 | 24.9±4.8 | 21.2±2.5 | 24.9±1.4 |

Cells were incubated in the absence or presence of 45.8 ppm of either GSE (47 $\mu\text{M}$  catechin, 46  $\mu\text{M}$  epicatechin, 23  $\mu\text{M}$  EGCG and 6 $\mu\text{M}$  procyanidin B2) or EGCG (100 $\mu\text{M}$ ), and the distribution of radiolabeled PA into lipid metabolites was analyzed. Results are expressed as mean  $\pm$  standard deviation (n=4).
