# Supplementary material
Source: PubMed Central journal article supplement (PMC3713019)
Supplement: jn.112.160101_nutrition160101SupplementaryData2.pdf [file jn.112.160101_nutrition160101SupplementaryData2.pdf]

## Online Supporting Material

**Supplemental Table 2:** Incorporation of  $^{14}\text{C}$ -DHA into lipid metabolites by Caco 2 cells in the presence of antioxidant.

| Lipid Class | 2 hours  |          |          | 6 hours  |          |          |
|-------------|----------|----------|----------|----------|----------|----------|
|             | DHA      | DHA+GSE  | DHA+EGCG | DHA      | DHA+GSE  | DHA+EGCG |
|             | %        |          |          |          |          |          |
| <b>TG</b>   | 72.1±1.2 | 73.7±1.5 | 69.8±3.3 | 83.1±3.5 | 82.9±2.4 | 82.9±0.6 |
| <b>FFA</b>  | 2.0±0.1  | 1.7±0.5  | 2.23±0.4 | 0.7±0.1  | 0.4±0.3  | 0.6±0.4  |
| <b>DG/C</b> | 2.1±0.1  | 1.8±0.3  | 2.08±0.1 | 1.5±0.4  | 1.4±0.1  | 1.6±0.3  |
| <b>MG</b>   | 0.2±0.1  | 0.2±0.1  | 0.17±0.1 | 1.3±0.3  | 1.0±0.1  | 0.9±0.3  |
| <b>PL</b>   | 23.6±1.5 | 22.5±0.4 | 25.6±2.8 | 13.5±0.3 | 14.6±2.2 | 14.4±1.2 |

Cells were incubated in the absence or presence of 45.8 ppm of either GSE (47 $\mu\text{M}$  catechin, 46  $\mu\text{M}$  epicatechin, 23  $\mu\text{M}$  EGCG and 6 $\mu\text{M}$  procyanidin B2) or EGCG (100 $\mu\text{M}$ ), and the distribution of radiolabeled DHA into lipid metabolites was analyzed. Results are expressed as mean  $\pm$  standard deviation (n=4).
